# Supplementary figures and images for: Rapid selection response to ethanol in Saccharomyces eubayanus emulates the domestication process under brewing conditions
Source: PubMed Central journal article supplement — Microb Biotechnol. 2021 Mar 23;15(3):967–84. doi: 10.1111/1751-7915.13803 (PMC8913853; doi:10.1111/1751-7915.13803), 2021-03-23

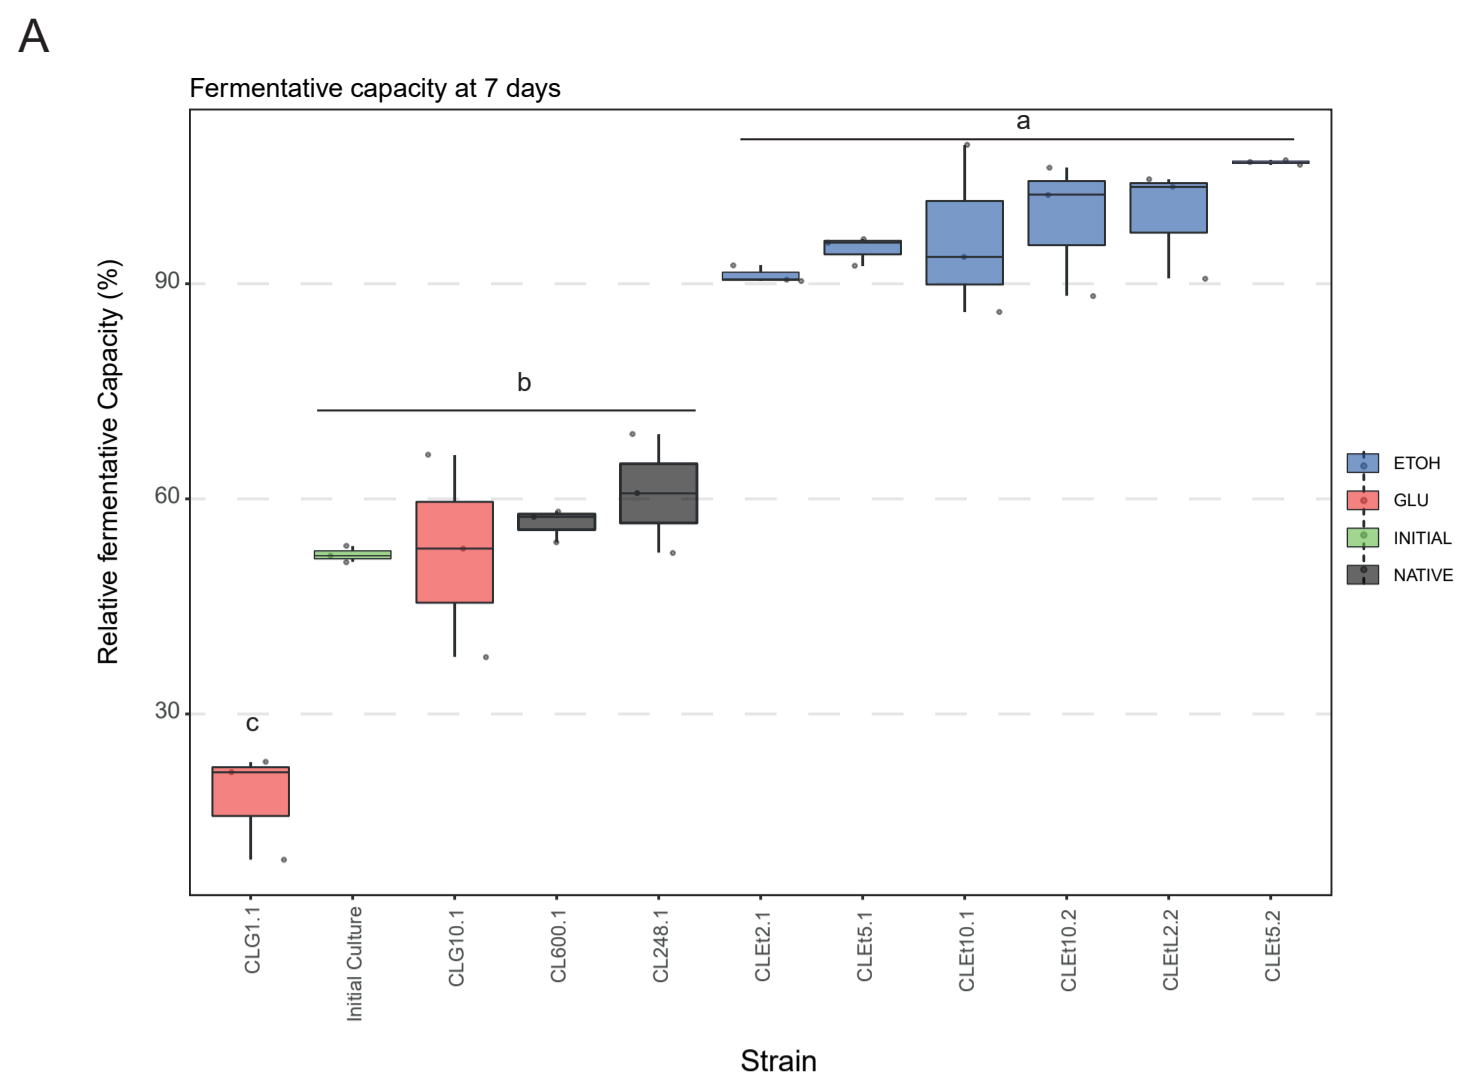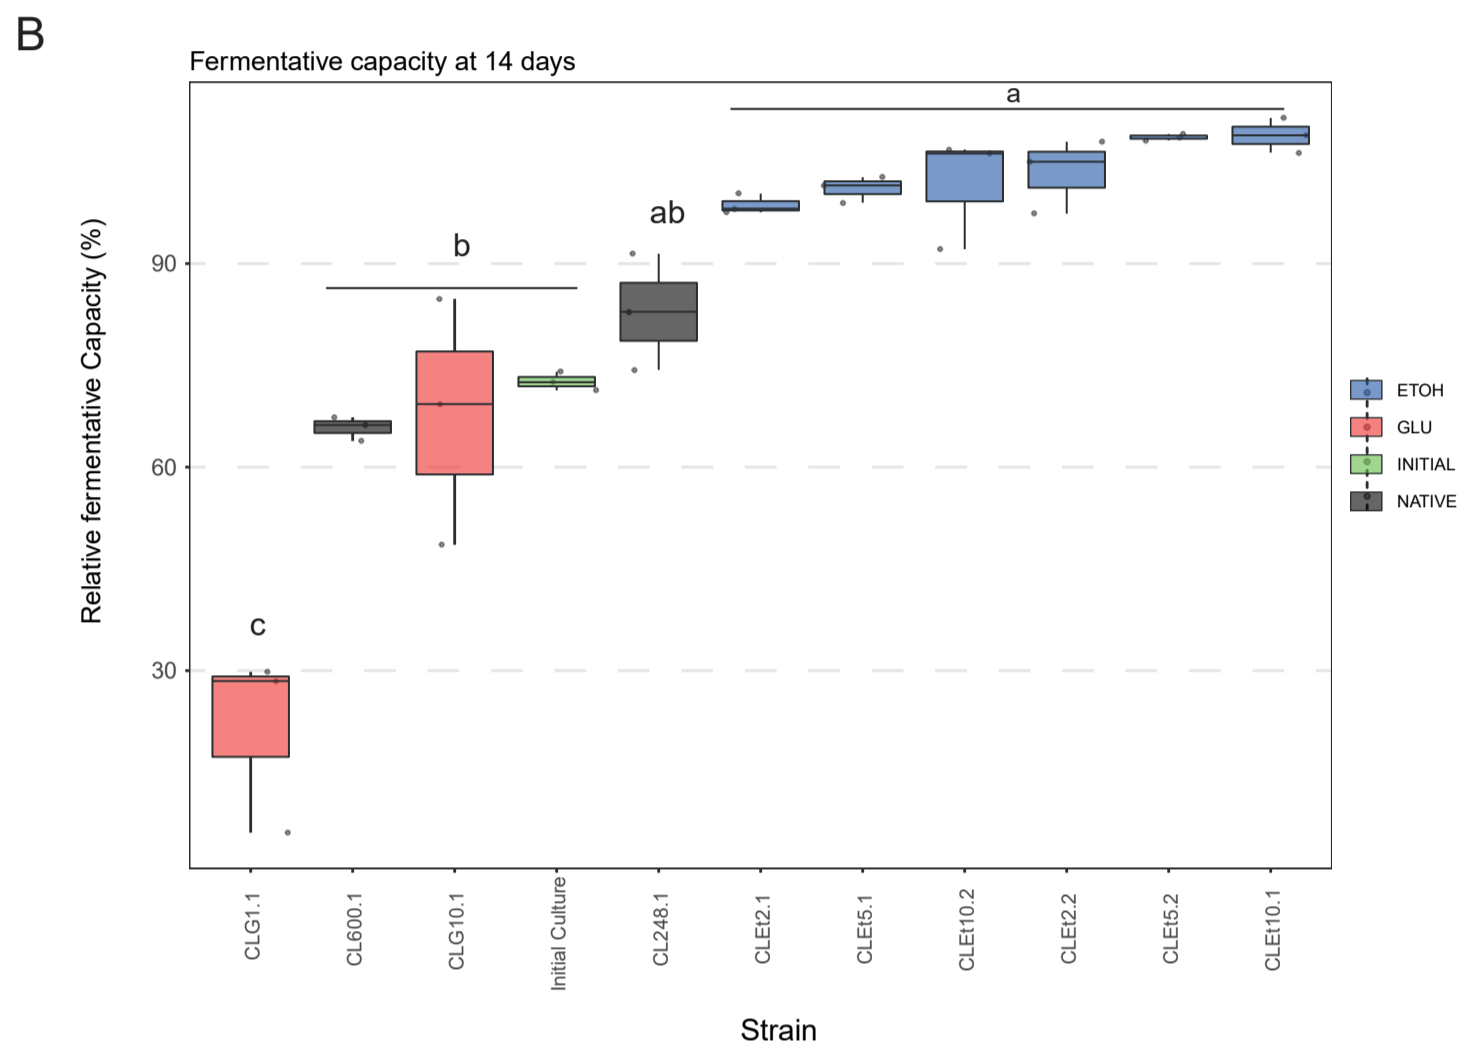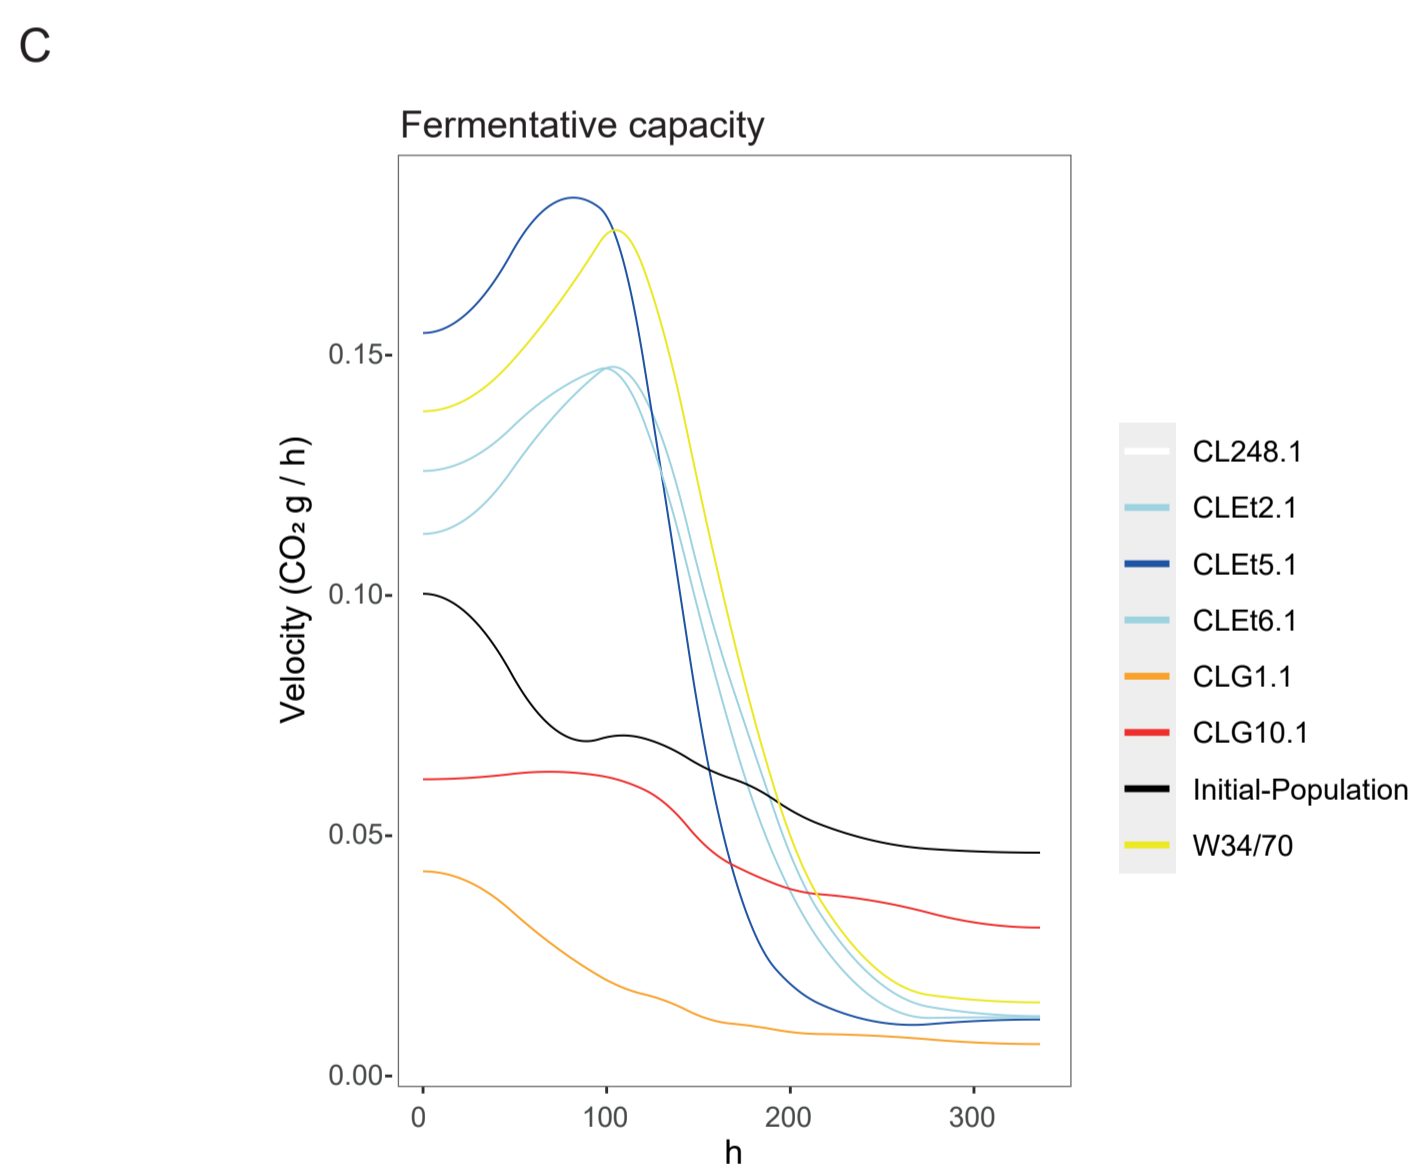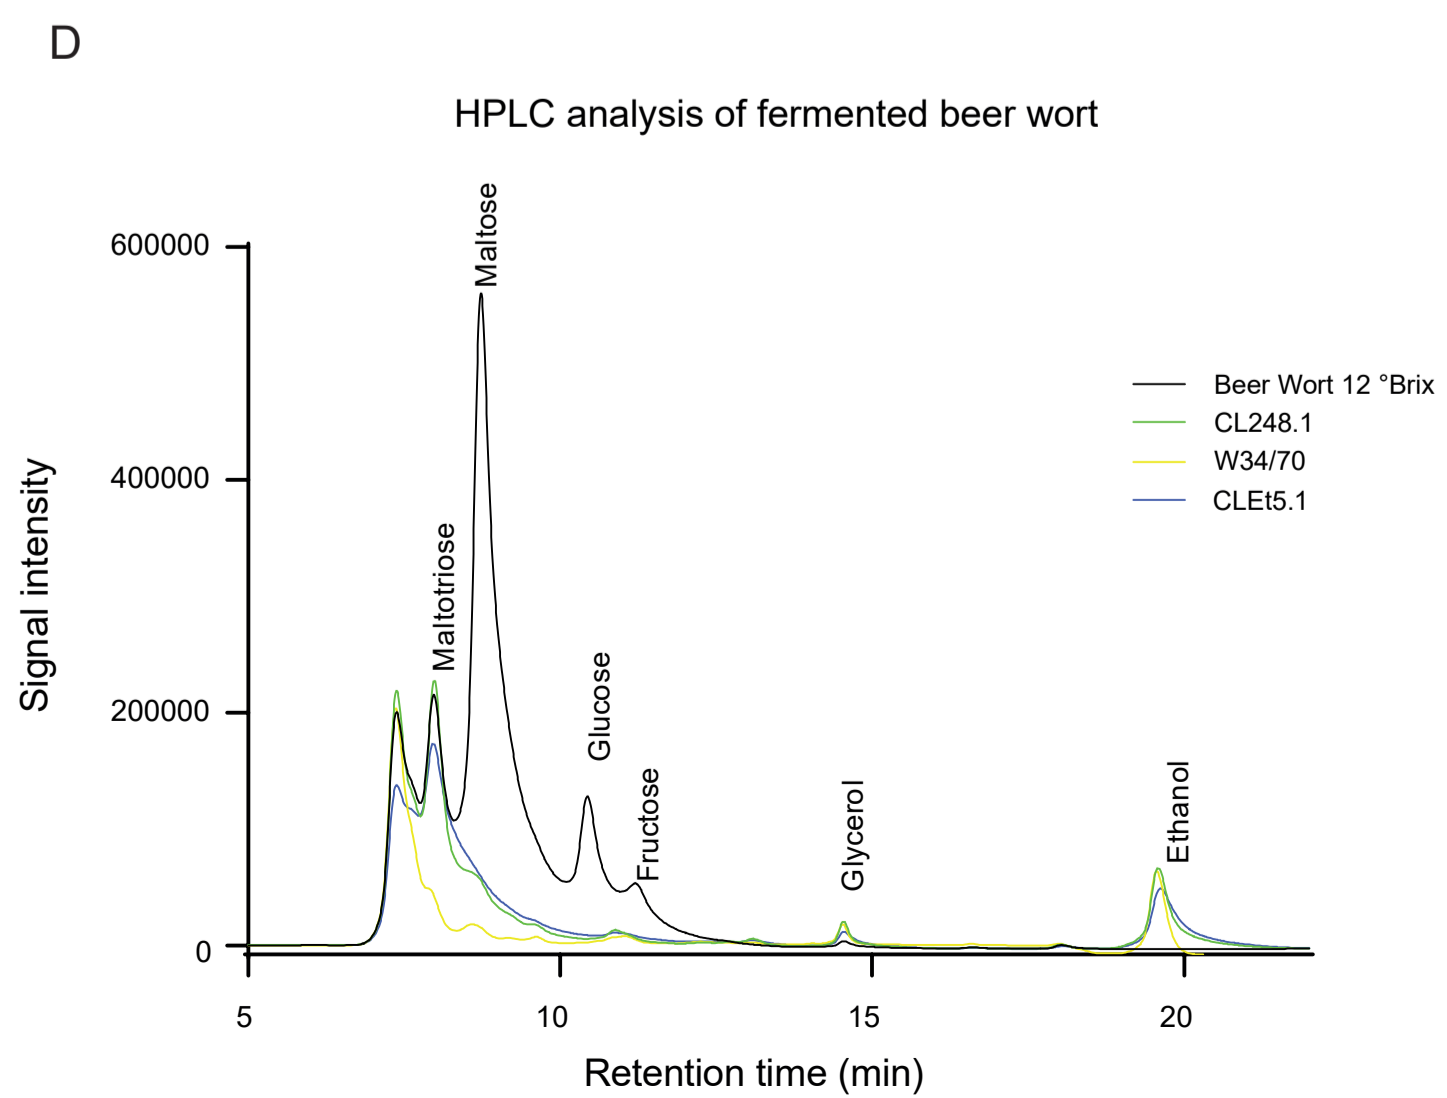

Figure S2

Supplement: MBT2-15-967-s002.pdf [file MBT2-15-967-s002.pdf]

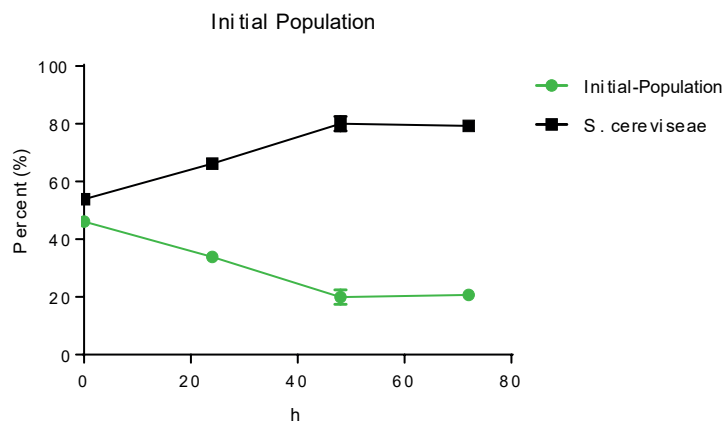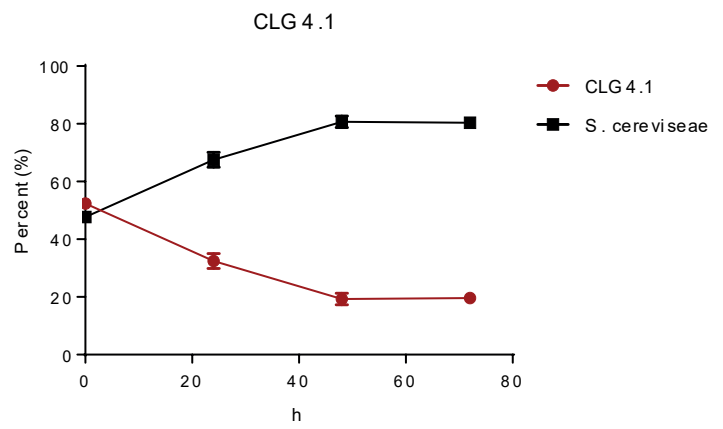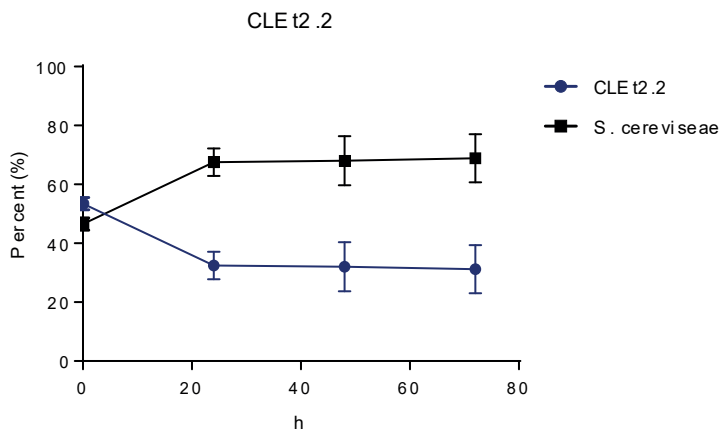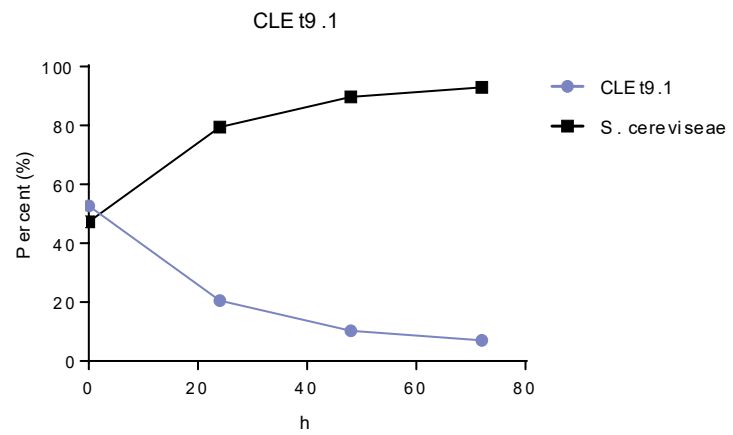

Figure S1

Supplement: MBT2-15-967-s003.pdf [file MBT2-15-967-s003.pdf]
